# Supplementary material for: High thermoelectric performance in Bi0.46Sb1.54Te3 nanostructured with ZnTe
Source: Royal Society of Chemistry journal article supplement (doi:10.1039/c8ee00290h), 2018-01-01
Supplement: c8ee00290h1.pdf [file c8ee00290h1.pdf]

## Supplementary information

### High thermoelectric performance in $\text{Bi}_{0.46}\text{Sb}_{1.54}\text{Te}_3$ nanostructured with ZnTe

Rigui Deng,<sup>a</sup> Xianli Su,<sup>a,b\*</sup> Shiqiang Hao,<sup>c</sup> Zheng Zheng,<sup>a</sup> Min Zhang,<sup>a</sup> Hongyao Xie,<sup>a</sup>

Wei Liu,<sup>a</sup> Yonggao Yan,<sup>a</sup> Chris Wolverton,<sup>c</sup> Ctirad Uher,<sup>d</sup> Mercuri G. Kanatzidis,<sup>b,c\*</sup>

and Xinfeng Tang<sup>a\*</sup>

<sup>a</sup> *State Key Laboratory of Advanced Technology for Materials Synthesis and Processing,  
Wuhan University of Technology, Wuhan 430070, China*

<sup>b</sup> *Department of Chemistry, Northwestern University, Evanston, Illinois 60208, USA*

<sup>c</sup> *Department of Materials Science and Engineering, Northwestern University, Evanston,  
Illinois 60208, USA*

<sup>d</sup> *Department of Physics, University of Michigan, Ann Arbor, MI 48109, USA*

\*Corresponding authors: X. Su (suxianli@whut.edu.cn), M. G. K. (m-kanatzidis@northwestern.edu), X. Tang (tangxf@whut.edu.cn).

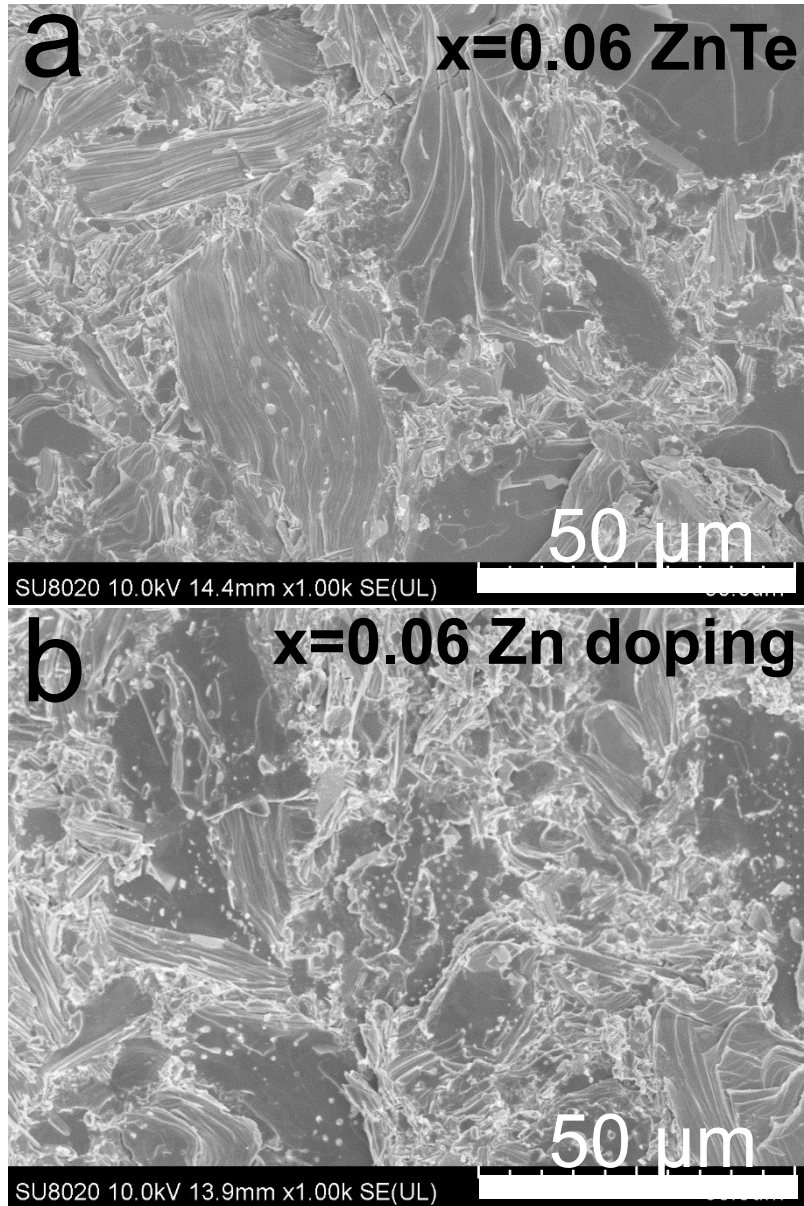

Figure S1: FESEM images of fracture surfaces of sintered samples of (a)  $\text{Zn}_x\text{Bi}_{0.46}\text{Sb}_{1.54}\text{Te}_{3+x}$  :  $x=0.06$  and (b)  $\text{Zn}_x(\text{Bi}_{0.46}\text{Sb}_{1.54})_{1-x/2}\text{Te}_3$  :  $x=0.06$ .

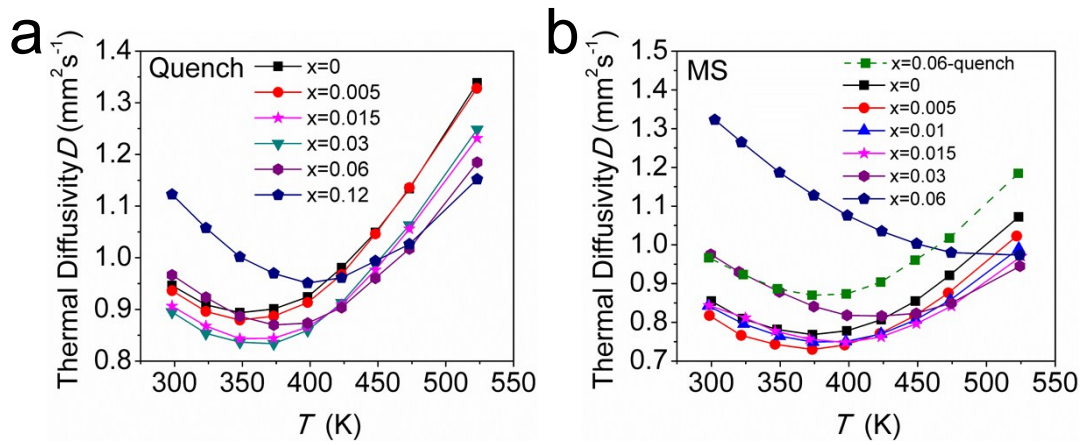

Figure S2: The thermal diffusivity  $D$  of samples prepared by (a) conventional and (b) MS method.

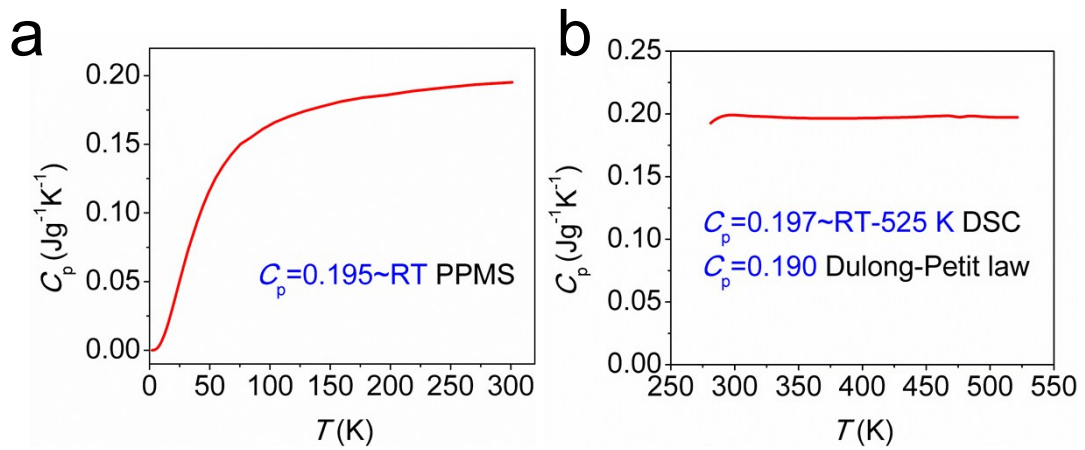

Figure S3: The heat capacity  $C_p$  of MS samples with ZnTe  $x = 0.015$  measured by (a) PPMS and (b) DSC. At room temperature, the heat capacity  $C_p$  measured by PPMS is  $0.195 \text{ Jg}^{-1}\text{K}^{-1}$ , while the heat capacity  $C_p$  measured by the DSC is  $0.197 \text{ Jg}^{-1}\text{K}^{-1}$  in the temperature range between 300 K and 525 K. The test results from both systems are close to the value ( $0.190 \text{ Jg}^{-1}\text{K}^{-1}$ ) calculated by Dulong-Petit law. All samples prepared by conventional and MS methods show quite similar  $C_p$ . In order to avoid underestimating the thermal conductivity, we use  $C_p$  as a constant of  $0.197 \text{ Jg}^{-1}\text{K}^{-1}$  to calculate the thermal conductivity in this paper.

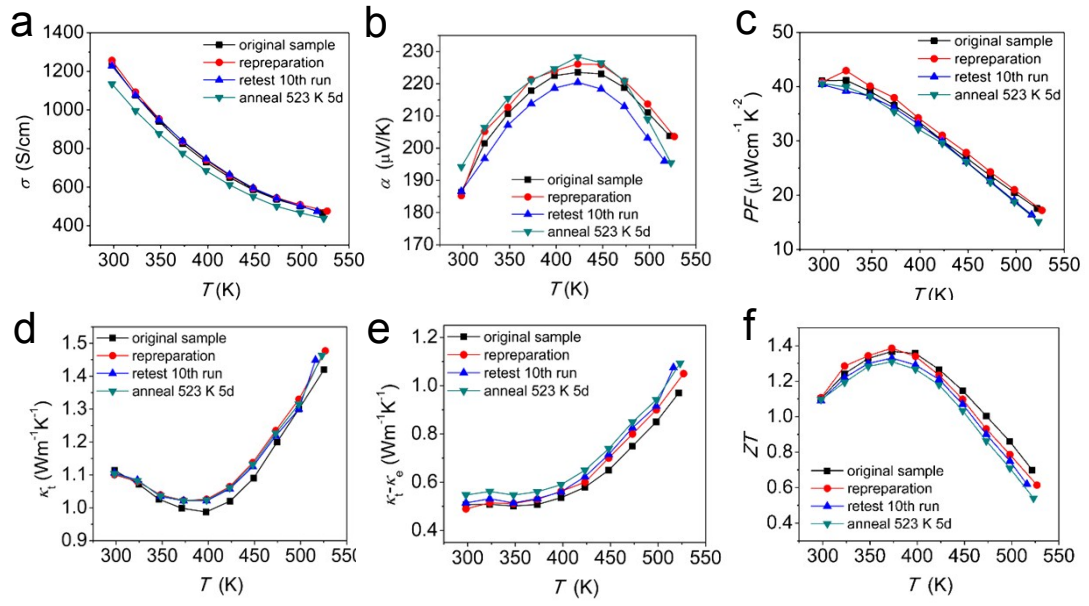

Figure S4: Temperature dependence of (a) the electrical conductivity, (b) the Seebeck coefficient (c) the power factor (d) the total thermal conductivity (e) the lattice thermal conductivity, and (f) the  $ZT$  value for samples after different treatments.

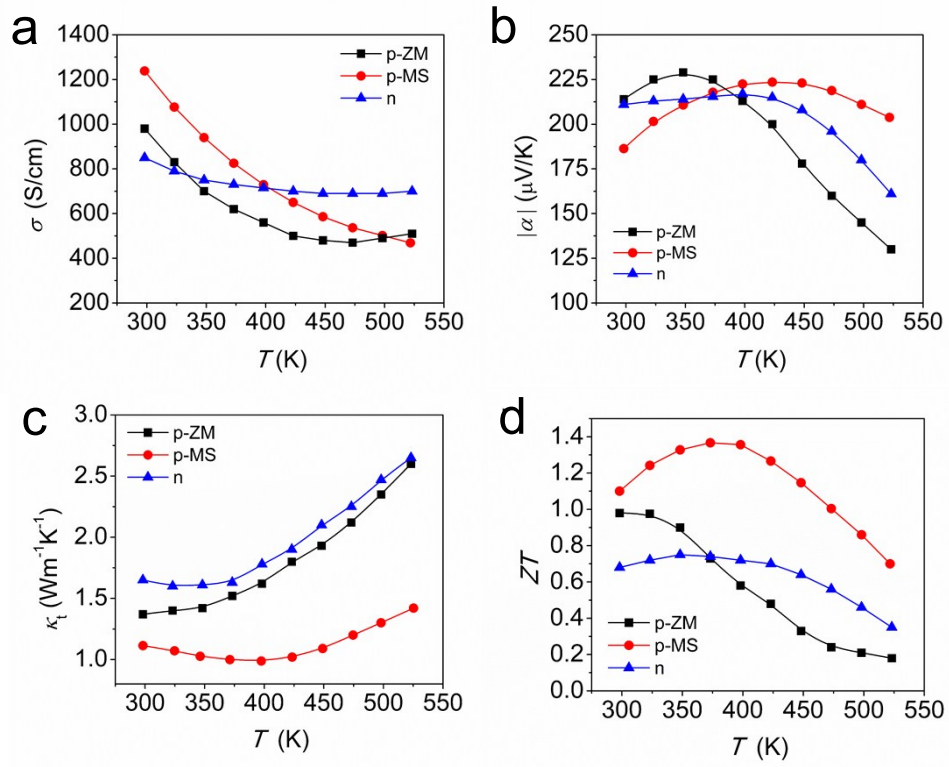

Figure S5: The thermoelectric properties of materials fabricating modules.

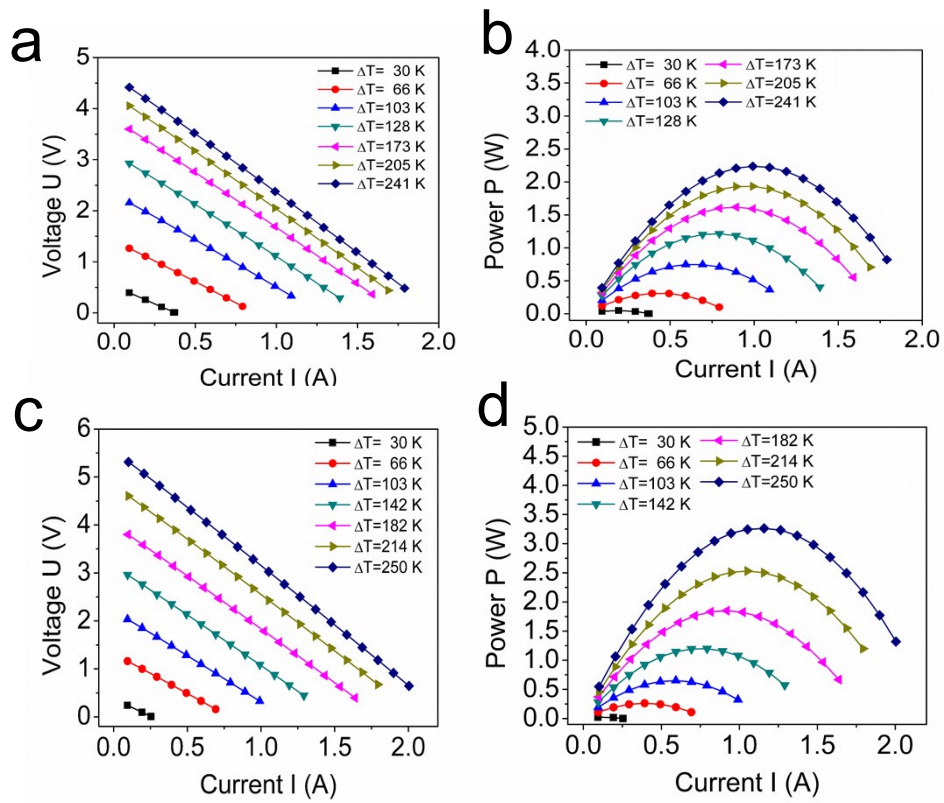

Figure S6: The output performance of (a-b) ZM module and (c-d) MS module.

Table S1: Density of bulk samples prepared by conventional and MS methods.

| Density $\rho$<br>(gcm <sup>-3</sup> ) | x=0  | x=0.005 | x=0.01 | x=0.015 | x=0.03 | x=0.06 | x=0.12 |
|----------------------------------------|------|---------|--------|---------|--------|--------|--------|
| Quench                                 | 6.65 | 6.67    | 6.64   | 6.62    | 6.63   | 6.58   | 6.60   |
| MS                                     | 6.67 | 6.59    | 6.64   | 6.64    | 6.70   | 6.66   | -      |



Table S2: Performance parameters of the fabricated modules.

|     | $T/\square$ | $\Delta$ | $T_h/^\circ\text{C}$ | $T_c/^\circ\text{C}$ | $Q/\text{J s}^{-1}$ | $P_{\text{max}}/\text{W}$ | $\eta_{\text{max}}/\%$ |
|-----|-------------|----------|----------------------|----------------------|---------------------|---------------------------|------------------------|
| 100 | ZM          | 66.5     | 81.9                 | 15.4                 | 14.3                | 0.31                      | 2.17                   |
| 100 | MS          | 65.5     | 80.1                 | 13.6                 | 15.6                | 0.31                      | 1.98                   |
| 150 | ZM          | 102.7    | 122.2                | 19.5                 | 24.1                | 0.75                      | 3.11                   |
| 150 | MS          | 102.6    | 122.8                | 20.2                 | 26.9                | 0.79                      | 2.92                   |
| 200 | ZM          | 138.0    | 162.2                | 24.2                 | 32.5                | 1.21                      | 3.70                   |
| 200 | MS          | 142.0    | 165.0                | 23.0                 | 35.6                | 1.36                      | 3.81                   |
| 250 | ZM          | 172.5    | 201.0                | 28.5                 | 42.9                | 1.70                      | 3.92                   |
| 250 | MS          | 181.7    | 205.9                | 24.2                 | 43.0                | 1.89                      | 4.41                   |
| 300 | ZM          | 204.7    | 238.1                | 33.4                 | 53.1                | 2.03                      | 3.83                   |
| 300 | MS          | 213.6    | 245.3                | 31.7                 | 52.8                | 2.52                      | 4.77                   |
| 350 | ZM          | 241.2    | 279.2                | 38.0                 | 64.5                | 2.35                      | 3.65                   |
| 350 | MS          | 249.3    | 282.9                | 33.6                 | 64.9                | 3.25                      | 5.01                   |
